# Supplementary material for: Linear ubiquitin assembly complex regulates lung epithelial–driven responses during influenza infection
Source: JCI journal article supplement (doi:10.1172/jci128368), 2019-11-12
Supplement: sd1 [file 1]

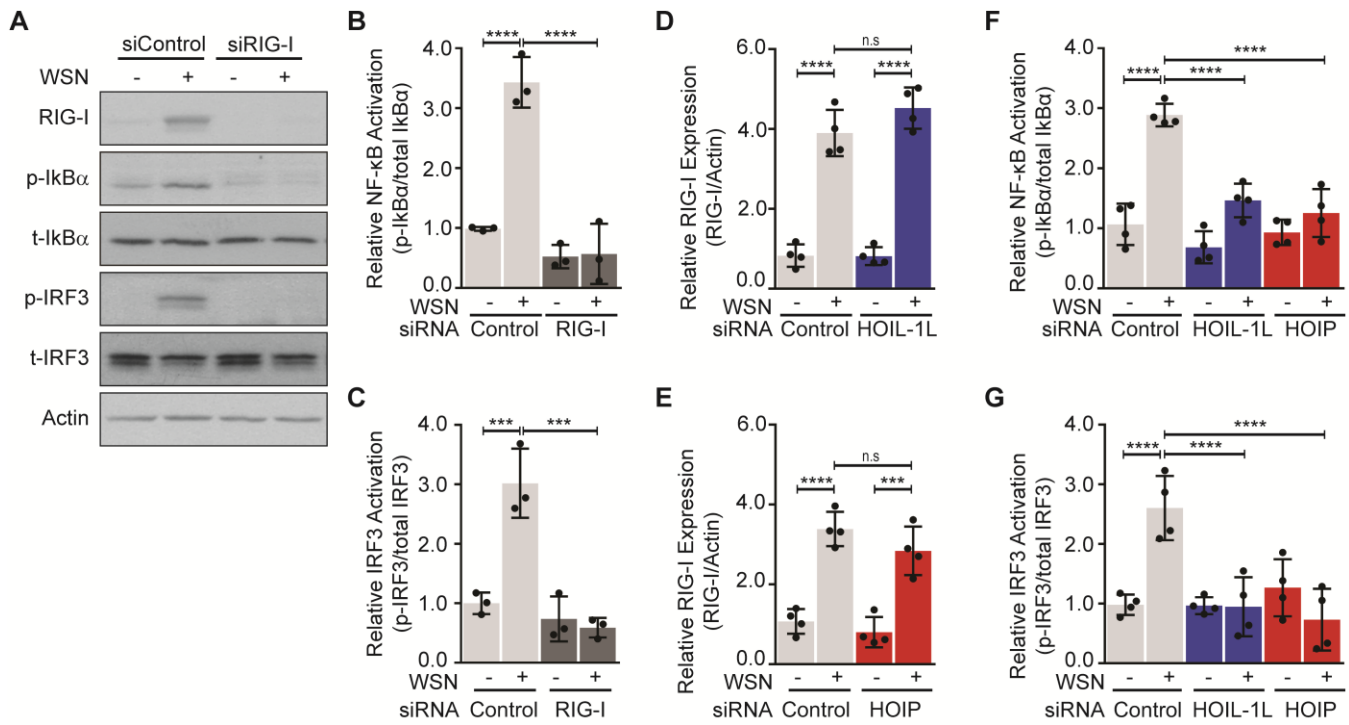

**Supplemental Figure 1. LUBAC activates NF-κB and IRF downstream of RIG-I during IAV infection. (A)**

A549 cells were infected with WSN (1 MOI, 16 h) after transfection with a non-targeting siRNA (siControl) or siRNA against RIG-I. Representative immunoblot of NF-κB activation (p-IkBα/total IkBα) and IRF3 activation (p-IRF3/total IRF3) are shown **(B-C)** Bar graphs showing the quantification of **(B)** NF-κB and **(C)** IRF3 activation from **A** (n=3) **(D-E)** Bar graphs showing the quantification of RIG-I activation in the presence and absence of siRNA against **(D)** HOIL-1L or **(E)** HOIP from Figure 1A-B respectively (n=4). **(F-G)** Bar graphs showing the quantification of **(F)** NF-κB 1C and **(G)** IRF3 activation from Figure 1D-E respectively (n=4). Mean  $\pm$  s.d. overlaid with individual data points representing replicates are depicted, \* $P < 0.05$ , \*\* $P < 0.01$ , \*\*\* $P < 0.005$ , \*\*\*\* $P < 0.0001$  (one-way ANOVA followed by Bonferroni post-hoc test).

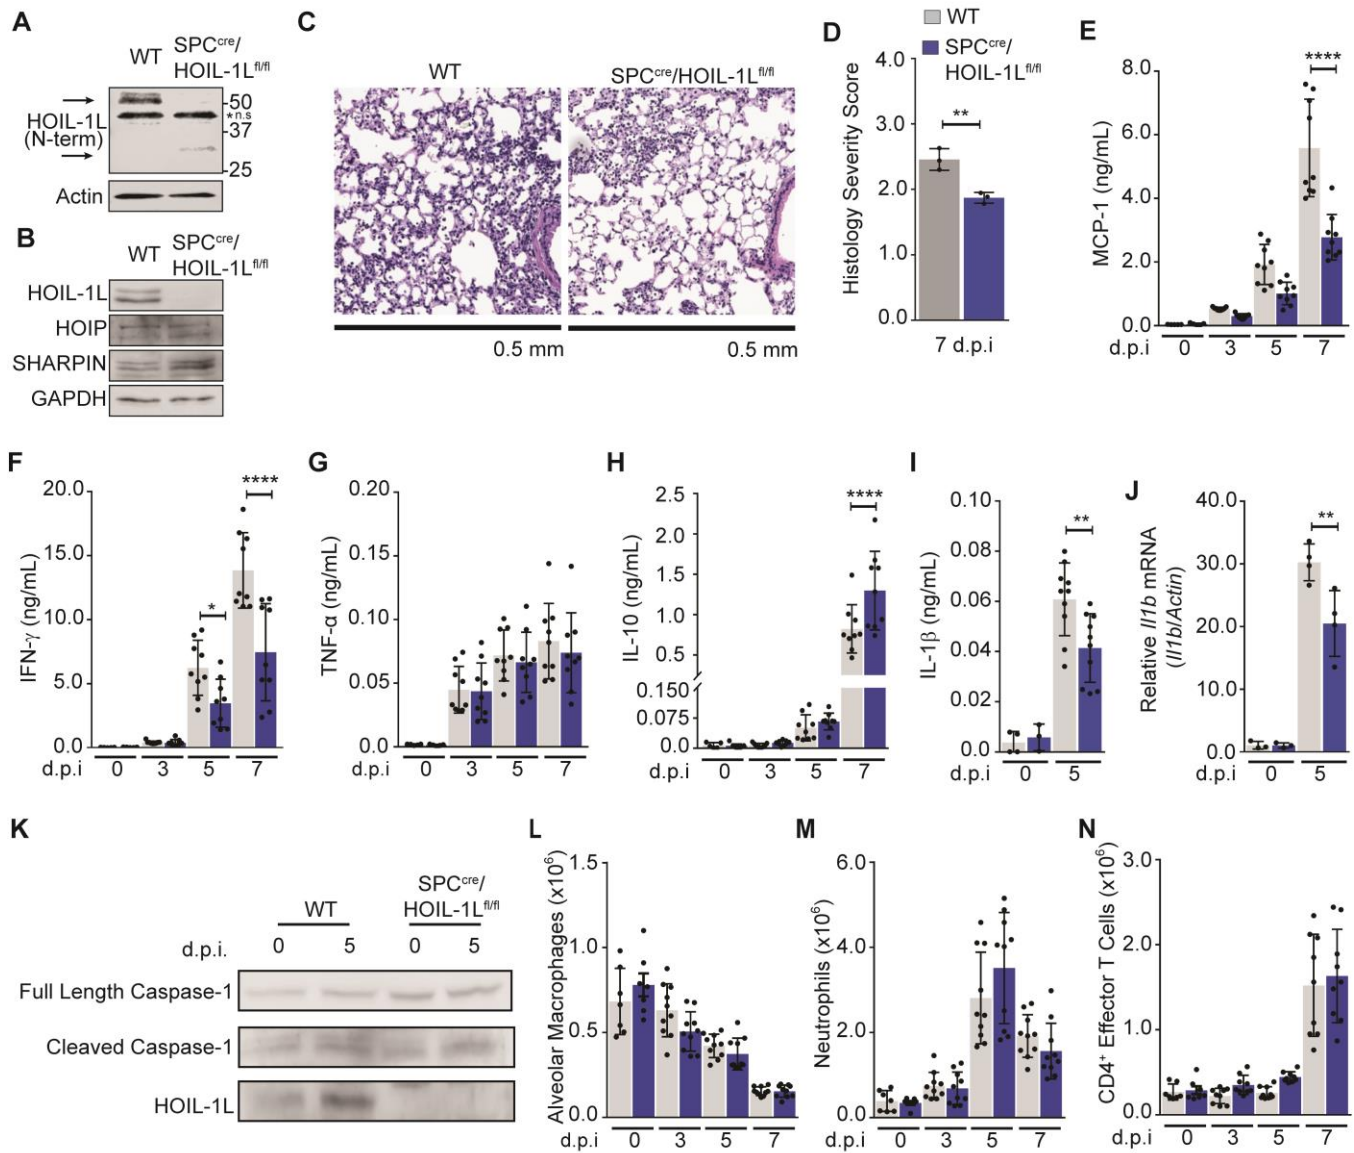

## Supplemental Figure 2. Loss of HOIL-1L in the alveolar epithelium decreases inflammation during IAV

**infection in mice.** WT and SPC<sup>cre</sup>/HOIL-1L<sup>fl/fl</sup> mice were i.t. infected with a lethal dose of WSN **(A-B)**

Representative immunoblot showing HOIL-1L, HOIP and SHARPIN expression in WT and SPC<sup>cre</sup>/HOIL-1L<sup>fl/fl</sup> AT2 cells, n.s denotes non-specific band (n=3). **(C)** Brightfield images of lung sections from WT and SPC<sup>cre</sup>/HOIL-1L<sup>fl/fl</sup> mice at 7 d.p.i. stained with H&E, and **(D)** quantified for severity of lung injury as defined in Methods (Scale bar, 0.5 mm.) **(E-H)** BALF cytokine levels were analyzed by ELISA at 0 (n=5) and 3, 5, 7 d.p.i. (n=9) **(E)** MCP-1 **(F)** IFN-γ **(G)** TNF-α **(H)** IL-10. **(I)** BALF levels of IL-1β at 0 (WT n=3, SPC<sup>cre</sup>/HOIL-1L<sup>fl/fl</sup> n=4) and 5 (n=10) d.p.i. **(J)** *I1b* mRNA expression in AT2 cells at 0 (n=3) and 5 (n=4) d.p.i. **(K)** Representative Immunoblot of Caspase-1 cleavage in AT2 cells at 0 and 5 d.p.i.(n=2). **(L-N)** Immune populations were

analyzed in whole lung homogenate by FACS at 0 (n=7) and 3, 5, 7 d.p.i. (n=10). **(G)** SiglecF<sup>hi</sup> CD11c<sup>hi</sup> Alveolar Macrophages **(H)** Ly6G<sup>+</sup> CD11b<sup>+</sup> CD24<sup>+</sup> Neutrophils **(I)** CD44<sup>+</sup> CD62L<sup>-</sup> CD4<sup>+</sup> T cells. Mean  $\pm$  s.d overlaid with individual data points representing replicates are depicted, \*P < 0.05, \*\*P < 0.01, \*\*\*P < 0.005, \*\*\*\*P < 0.0001 (one-way ANOVA followed by Bonferroni post-hoc test).

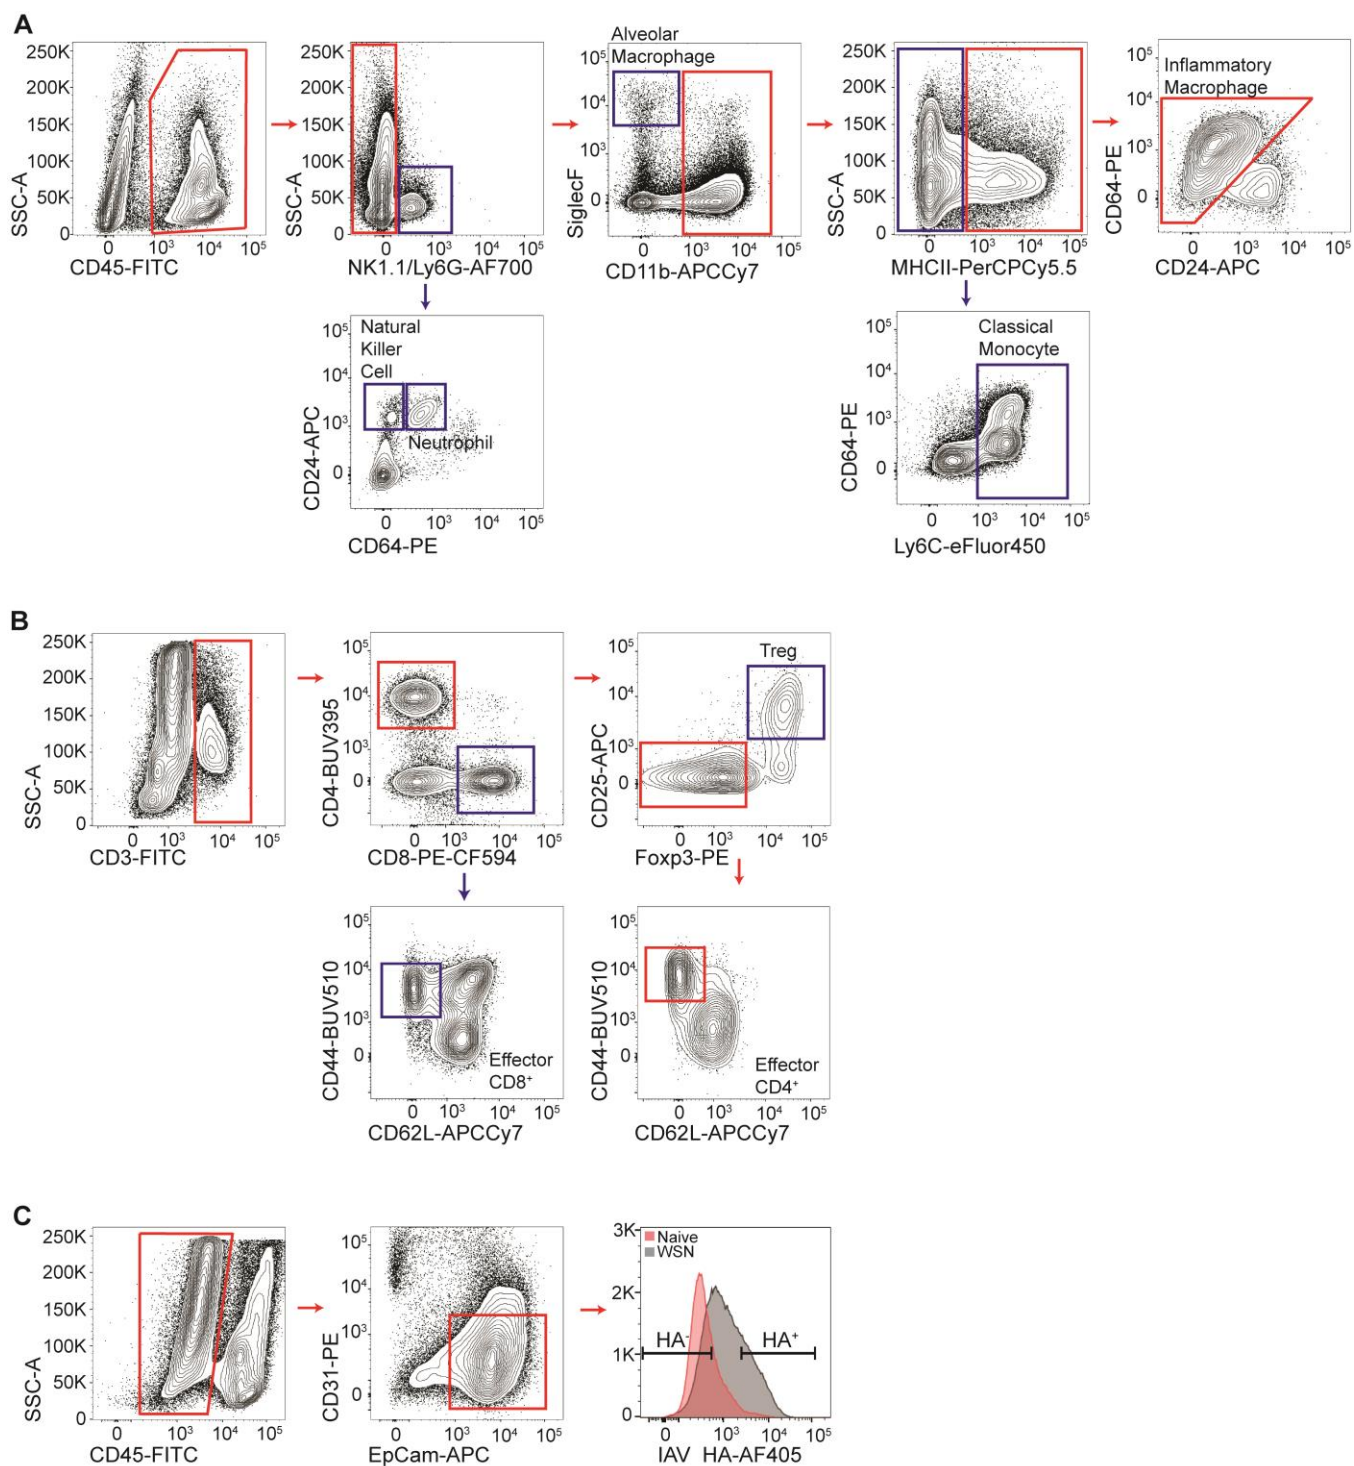

**Supplemental Figure 3. Flow cytometric gating strategies.**

Representative panel for identification of **(a)** myeloid cell populations using known lineage markers, **(b)** lymphoid cell populations using known lineage markers, **(c)** AT2 cells using known surface markers with the addition of influenza virus surface protein HA for separation of infected ( $HA^+$ ) and non-infected ( $HA^-$ ) cells.

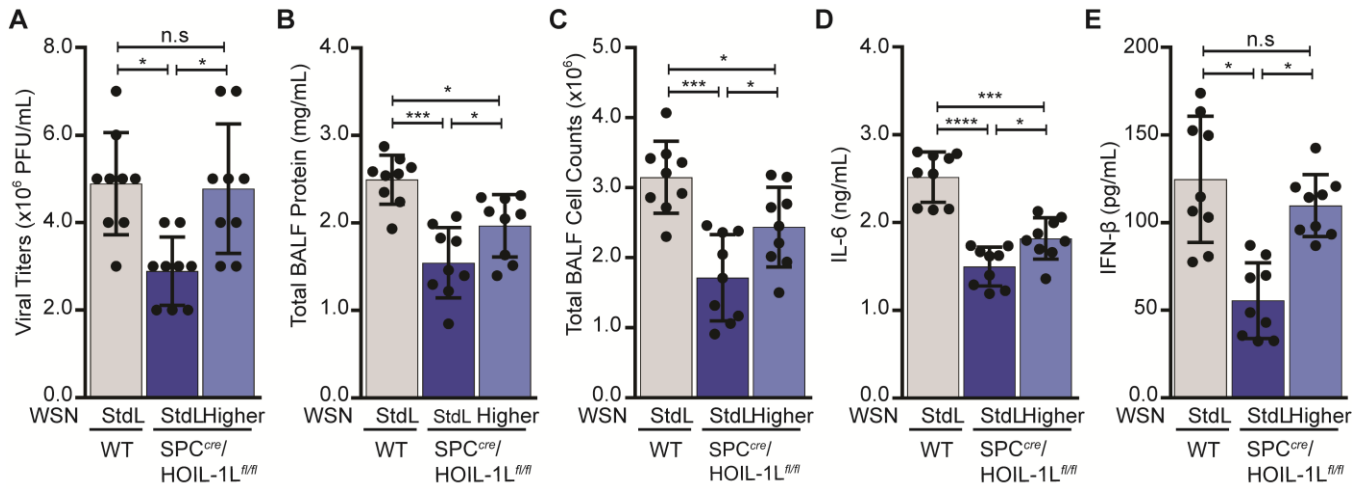

**Supplemental Figure 4. SPC<sup>cre</sup>/HOIL-1L<sup>fl/fl</sup> mice challenged with higher doses of IAV remain protected.**

WT and SPC<sup>cre</sup>/HOIL-1L<sup>fl/fl</sup> mice were i.t. infected with a standard lethal dose (StdL) of WSN, a group of SPC<sup>cre</sup>/HOIL-1L<sup>fl/fl</sup> mice receiving a 30% higher dose (Higher). **(A)** Viral load as measured by plaque assay in whole lung BALF was collected for analysis of **(B)** total protein, **(C)** total cell count, **(D)** IL-6 **(E)** IFN- $\beta$ . A-E (n=9) Mean  $\pm$  s.d. overlaid with individual data points representing replicates are depicted, \*P < 0.05, \*\*P < 0.01, \*\*\*P < 0.005, \*\*\*\*P < 0.0001 (one-way ANOVA followed by Bonferroni post-hoc test).

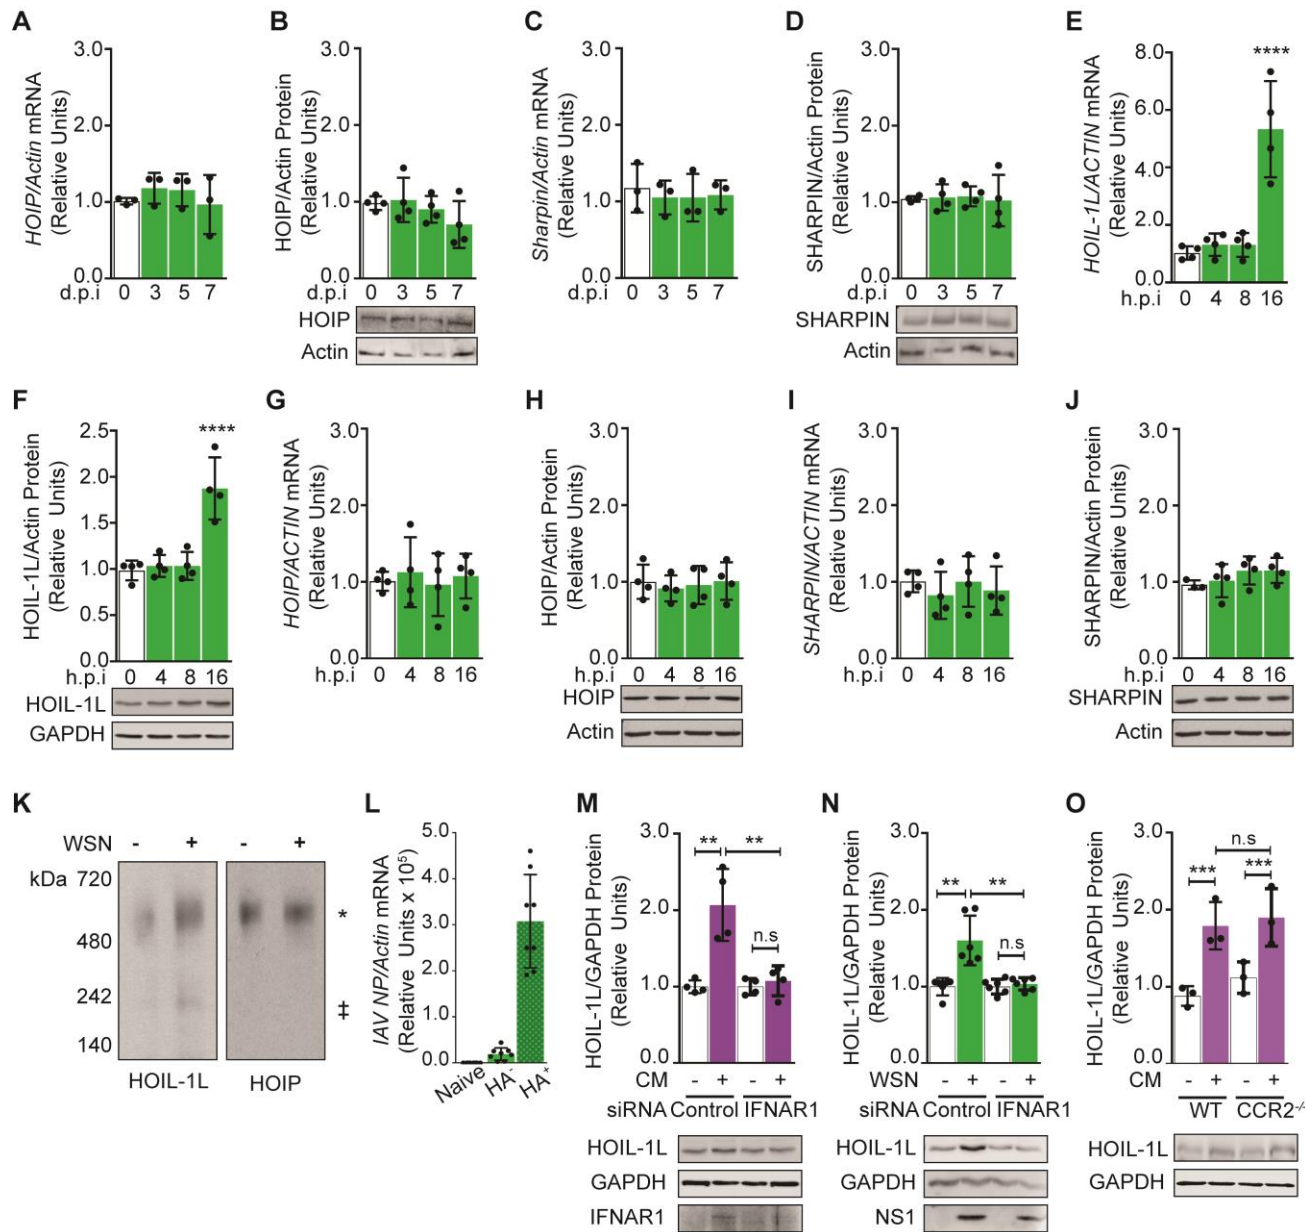

**Supplemental Figure 5. HOIL-1L is upregulated during IAV infection through the type I interferon**

**receptor signaling axis. (A-D)** AT2 cells were isolated from WT mice 0, 3, 5 and 7 d.p.i. **(A,C)** mRNA levels and **(B,D)** representative immunoblots and quantifications depicted. **(A)** HOIP mRNA (n=3) **(B)** HOIP protein expression (n=4). **(C)** SHARPIN mRNA (n=4) **(D)** SHARPIN protein expression (n=4). **(E-J)** A549 cells infected for 0, 4, 8 and 16 hours with WSN. **(E,G,I)** mRNA levels and **(F,H,J)** representative immunoblots and quantifications depicted. **(E)** HOIL-1L mRNA (n=4) **(F)** HOIL-1L protein expression (n=5). **(G)** HOIP mRNA (n=3) **(H)** HOIP protein expression (n=4). **(I)** SHARPIN mRNA (n=3) **(J)** SHARPIN protein expression (n=4). **(K)** Representative Native PAGE immunoblot of LUBAC formation in A549 cells treated with WSN (n=3) **(L)** NP mRNA expression in AT2 sorted based on expression of viral HA (n=9). **(M-N)** Representative Immunoblot and

quantification of HOIL-1L expression in A549 cells transfected with siControl or siFNAR1 and treated with **(M)** CM (n=4) **(N)** WSN (n=4) **(O)** Representative Immunoblot and quantification of HOIL-1L expression in WT and CCR2<sup>-/-</sup> AEC treated with CM in vitro (n=3). Blots in **H,J** from same blot with loading control shown twice. Means  $\pm$ SD overlaid with Individual data points representing replicates are depicted, \* $P < 0.05$ , \*\* $P < 0.01$ , \*\*\* $P < 0.005$ , \*\*\*\* $P < 0.0001$  (one-way ANOVA followed by Bonferroni post-hoc test).

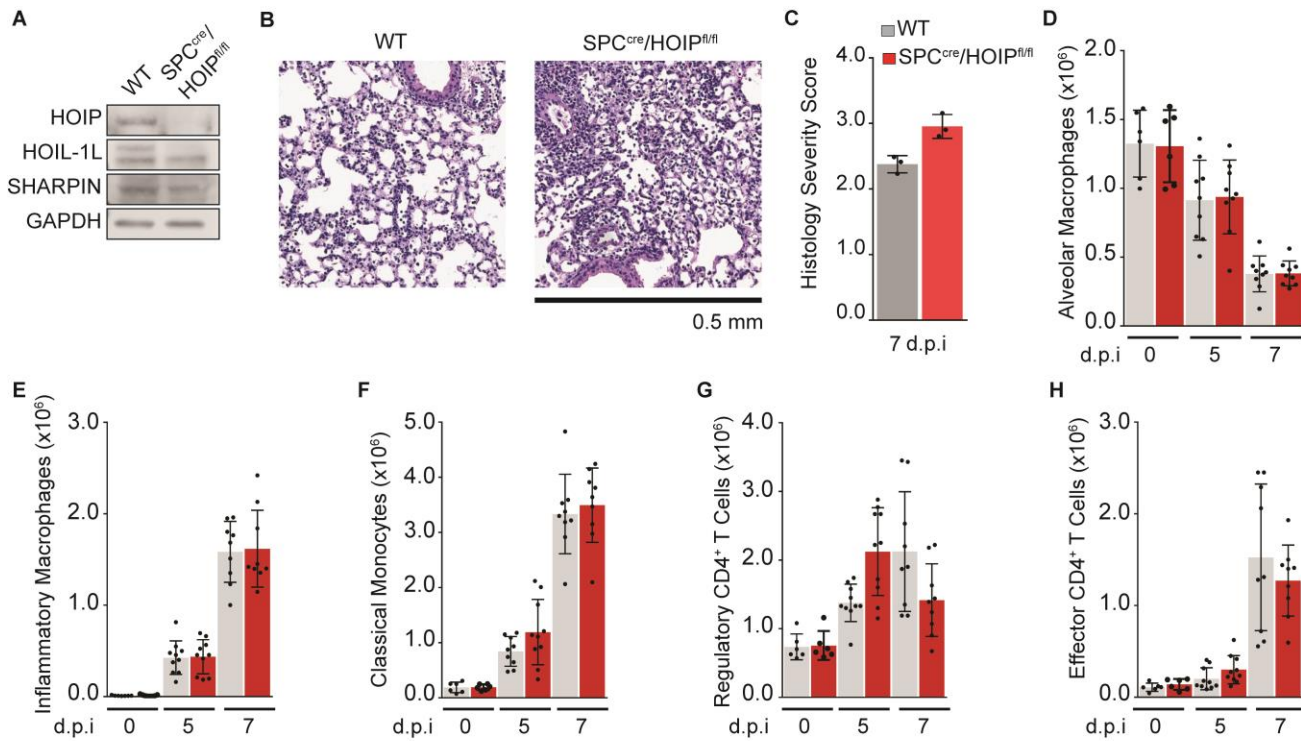

**Supplemental Figure 6. Effect of loss of alveolar epithelial HOIP on host inflammatory response to IAV.**

**(A)** Representative immunoblot showing HOIP, HOIL-1L and SHARPIN expression in isolated mouse AT2 from WT and SPC<sup>cre</sup>/HOIP<sup>fl/fl</sup> mice. **(B)** Brightfield images of lung sections from WT and SPC<sup>cre</sup>/HOIP<sup>fl/fl</sup> mice at 7 d.p.i stained with H&E, and **(C)** quantified for severity of lung injury as defined in Methods (Scale bar, 0.5 mm.) **(D-H)** Whole lung immune cell populations at 0, 3, 5 and 7 (n=9) d.p.i were analyzed by flow cytometry. **(D)** SiglecF<sup>hi</sup> CD11c<sup>hi</sup> Alveolar Macrophages **(E)** CD11b<sup>hi</sup> MHCII<sup>hi</sup> CD24<sup>low</sup> CD64<sup>hi</sup> inflammatory macrophages **(F)** CD11b<sup>hi</sup> MHCII<sup>low</sup> Ly6C<sup>hi</sup> monocytes **(G)** CD4<sup>+</sup> CD25<sup>+</sup> Foxp3<sup>+</sup> T<sub>reg</sub> cells **(H)** CD44<sup>+</sup> CD62L<sup>+</sup> CD4<sup>+</sup> T cells. Means ±SD overlaid with individual data points representing replicates are depicted, \*P < 0.05, \*\*P < 0.01, \*\*\*P < 0.005, \*\*\*\*P < 0.0001 (one-way ANOVA followed by Bonferroni post-hoc test).

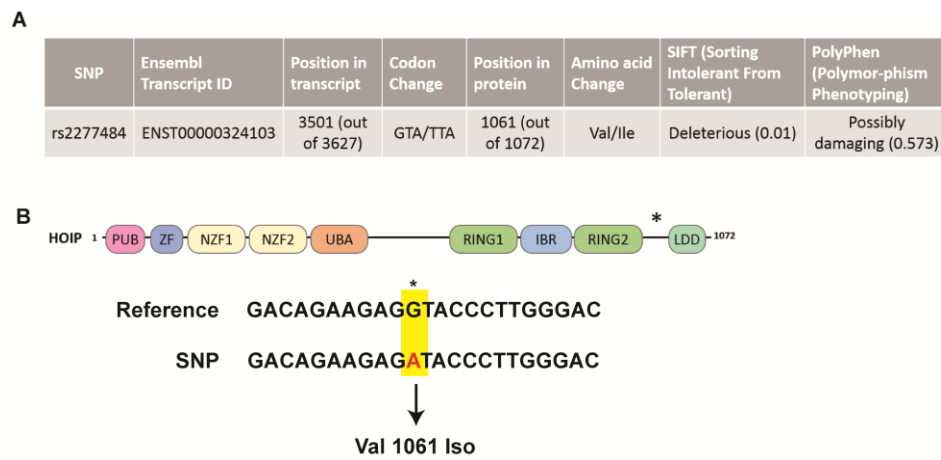

**Supplemental Figure 7. HOIP SNP in AA cohort may affect “catalytic core”. (A)** The consequence of rs2277484 on HOIP (RNF31) transcript is deleterious and possibly damaging based on SIFT and PolyPhen. **(B)** Schematic of HOIP domains depicting location of amino acid change (Val1061Ile).

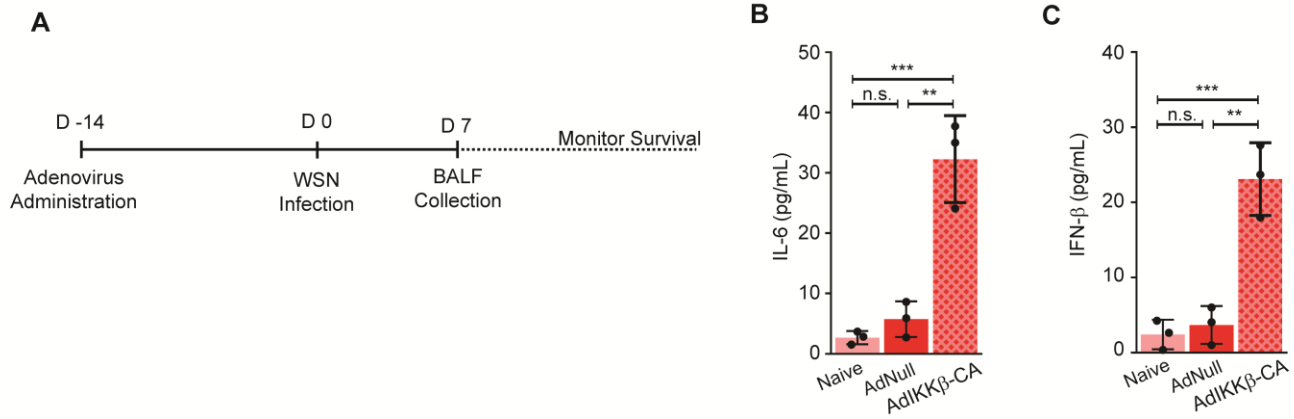

**Supplemental Figure 8. Rescue of NF-κB signaling in SPC<sup>cre</sup>/HOIP<sup>fl/fl</sup> mice with AdIKK-β-CA triggers antiviral response** (A) Timeline of adenovirus administration prior to WSN infection. (B-C) BALF from SPC<sup>cre</sup>/HOIP<sup>fl/fl</sup> mice naïve or administered either AdNull or AdIKK-β-CA was collected (n=3) and analyzed for (B) IL-6 and (C) IFN-β levels. Mean ± s.d overlaid with Individual data points representing replicates are depicted, \**P* < 0.05, \*\**P* < 0.01, \*\*\**P* < 0.005, \*\*\*\**P* < 0.0001. (B, one-way ANOVA followed by Bonferroni post-hoc test).

**Supplemental Table 1: Immunoblot Primary Antibodies**

| Target           | Clone    | Source         | Cat. No.    | Concentration | Lot         |
|------------------|----------|----------------|-------------|---------------|-------------|
| IFNAR1           | MAR1-5A3 | Biologend      | 127301      | 1:1000        | B163671     |
| HOIL-1L (C-term) | 2E2      | Millipore      | MABC576     | 1:1000        | 2915256     |
| HOIL-1L(N-term)  | N/A      | K. Iwai (33)   | N/A         | 1:1000        | N/A         |
| HOIP             | N/A      | Abcam          | ab46322     | 1:1000        | GR3176796-2 |
| SHARPIN          | N/A      | Cell Signaling | 4444S       | 1:1000        | 1           |
| GAPDH            | D16H11   | Cell Signaling | 2118        | 1:1000        | 6           |
| Actin            | N/A      | Sigma          | A2066       | 1:1000        | 018M4753V   |
| phospho-IkBa     | 5A5      | Cell Signaling | 9246        | 1:1000        | 19          |
| total-IkBa       | L35A5    | Cell Signaling | 4814        | 1:1000        | 17          |
| phospho-IRF3     | 4D4G     | Cell Signaling | 4947        | 1:1000        | 3           |
| total-IRF3       | EP2419Y  | Millipore      | MABf20      | 1:1000        | NRG1817797  |
| IRF1             | 13H3A44  | Biologend      | 657602      | 1:1000        | B174685     |
| RIG-I            | Alme-1   | Enzo           | ALX-804-960 | 1:1000        | 6281213     |
| NS1              | N/A      | Thermo Fisher  | PA5-32243   | 1:1000        | RH2247201   |
| NEMO             | DA10-12  | Cell Signaling | 2695        | 1:1000        | 3           |
| Linear Ubiquitin | LUB9     | Life Sensors   | AB130       | 1:1000        | 1           |
| IKKbeta          | W15160A  | Biologend      | 688402      | 1:1000        | B220786     |
| NEMO (IP)        | FL-419   | Santa Cruz     | sc-8330     | 1/50          | B0615       |
| IRF1 (ChIP)      | c-20     | Santa Cruz     | sc-497      | 10ug          | C1913       |

**Supplemental Table 2: Antibodies for Myeloid Flow Cytometry**

| Target    | Fluorophore            | Clone      | Source        | Cat. No.   | Concentration | Lot        |
|-----------|------------------------|------------|---------------|------------|---------------|------------|
| CD45      | FITC                   | 30-F11     | eBioscience   | 11-0451-81 | 2 µg/mL       | 4277449    |
| MHCII     | PerCP/Cy5.5            | M5/114.152 | Biolegend     | 107626     | 0.6 µg/mL     | B209411    |
| Ly6C      | AmyCyan<br>(eFluor450) | hk1.4      | eBioscience   | 48-5932-80 | 0.4 µg/mL     | 4306742    |
| LY6G      | Alexa700               | 1A8        | BD Bioscience | 561236     | 2 µg/mL       | 6102838    |
| NK1.1     | Alexa700               | PK136      | BD Bioscience | 560515     | 2 µg/mL       | 6137598    |
| CD11b     | APC-Cy7                | M1/70      | Biolegend     | 101225     | 0.4 µg/mL     | B213160    |
| CD11c     | PE-Cy7                 | HL3        | BD Bioscience | 561022     | 0.4 µg/mL     | 6033690    |
| CD24      | APC                    | M1/69      | eBioscience   | 17-0242-80 | 0.6 µg/mL     | E14923-105 |
| SiglecF   | PE-CF594               | E50-2440   | BD Bioscience | 562757     | 0.4 µg/mL     | 7292939    |
| Viability | eFluor506              | N/A        | Invitrogen    | 65-0866-14 | 1:1000        | 1923275    |

**Supplemental Table 3: Antibodies for Lymphoid Flow Cytometry**

| Target    | Fluorophore       | Clone    | Source        | Cat. No.   | Concentration | Lot     |
|-----------|-------------------|----------|---------------|------------|---------------|---------|
| CD3e      | FITC              | 145-2C11 | Invitrogen    | 11-0031-81 | 2 µg/mL       | 4323281 |
| CD8       | PE-CF594 / TexRed | 53-6.7   | Biolegend     | 100762     | 1 µg/mL       | B200503 |
| CD25      | APC               | PC61.5   | eBioscience   | 17-0251-82 | 2 µg/mL       | 4276862 |
| CD62L     | APCe780           | MEL-14   | eBioscience   | 47-0621-82 | 1 µg/mL       | 4272740 |
| CD44      | BV510             | IM7      | Biolegend     | 103043     | 1.5 µg/mL     | B240582 |
| CD4       | BUV395            | GK1.5    | BD Bioscience | 563790     | 2 µg/mL       | 6336811 |
| Foxp3     | PE                | FJK-16s  | eBioscience   | 15-5773-82 | 4 µg/mL       | 4323635 |
| Viability | UV                | N/A      | invitrogen    | L34961     | 1:1000        | 1724751 |

**Supplemental Table 4: Antibodies for AT2 Flow Cytometry**

| Target    | Fluorophore | Clone  | Source      | Cat. No.         | Concentration | Lot                 |
|-----------|-------------|--------|-------------|------------------|---------------|---------------------|
| EpCAM     | APC         | G8.8   | eBioscience | 17-5791-80       | 0.40 µg/mL    | 4289559             |
| CD45      | FITC        | 30-F11 | eBioscience | 11-0451-81       | 2.00 µg/mL    | 4277449             |
| CD31      | PE          | 390    | Invitrogen  | 12-0311-81       | 0.40 µg/mL    | E01191              |
| IAV HA    | AF405       | IVC102 | Novus       | NB100-65047AF405 | 7.00 µg/mL    | 210515-091217-AF405 |
| Viability | eFluor506   | N/A    | Invitrogen  | 65-0866-14       | 1:1000        | 1923275             |

**Supplemental Table 5: qRT-PCR Primer Pairs**

| Target       | Species | Forward                       | Reverse                       |
|--------------|---------|-------------------------------|-------------------------------|
| Actin        | Mouse   | 5'-GGCTGTATTCCCCTCCATCG-3'    | 5-CCAGTTGGTAACAATGCCATGT-3'   |
| HOIL-1L      | Mouse   | 5'-GATGTCAACGAGTTCACCTG-3'    | 5'-TCCTTCTTCTGCACCACA-3'      |
| HOIP         | Mouse   | 5'-GGTCTTCTCAGCTCTCCA-3'      | 5'-CACACTCCTCTACAGCTTCA-3'    |
| Sharpin      | Mouse   | 5'-ATGCCTGAACGAAGCCTT-3'      | 5'-TTGGGAGACTGGAAGTGG-3'      |
| IL-6         | Mouse   | 5'-TAGTCCTTCCTACCCCAATTTCC-3' | 5'-TTGGTCCTTAGCCACTCCTTC-3'   |
| MCP-1        | Mouse   | 5'-TTAAAAACCTGGATCGGAACCAA-3' | 5'-GCATTAGCTTCAGATTTACGGGT-3' |
| IFN- $\beta$ | Mouse   | 5'-CAGCTCCAAGAAAGGACGAAC-3'   | 5'-GGCAGTGTAAGTCTTCTGCAT-3'   |
| Actin        | Human   | 5'-CTGGACTTCGAGCAAGAGATGG-3'  | 5'-AGGAAGGAAGGCTGGAAGAGTG-3'  |
| HOIL-1L      | Human   | 5'-CTTCATTGACAACACCTACTC-3'   | 5'-TGAAGTCATTGACATCATCCT-3'   |
| HOIP         | Human   | 5'-TTTACGCCAAGAATAAATGTCC-3'  | 5'-CTCCTTCTGCTCTATCACTC-3'    |
| Sharpin      | Human   | 5'-GACCTAGCCCTCAGCA-3'        | 5'-CTACACATCTCACAGCCA-3'      |
| NP           | IAV     | 5'-CTCGTCGCTTATGACAAAGAAG-3'  | 5'-AGATCATCATGTGAGTCAGAC-3'   |
